# Supplementary material
Source: Springer Nature journal article supplement (https://www.springermedizin.de/resource/supplementary/12936_2010_1600_MOESM9_ESM.pdf/9541666)
Supplement: MOESM9 [file 9541666]

Taylor universal 2000  
FCR3S1.2 var1  
FCR3S1.2 var2  
Chen 1998

```
-----*-----  
- - - - - G C A C G M A G T T T T G C - - - - -  
A T G T G T A C T A T G T T G G C G C G C A G T T T T G C A G A T A T A G G T G A C A T A A T A C G A G G A A G A G A T T T A T A T C T T G  
A T A T G T A C T T C T C T T G C A C G A A G T T T T G C C G A T A T A G G T G A T A T T G T A A G A G G A A G A G A T A T G T T T A A A C  
- - - - - G G W G C W T G Y G C W C W T W Y M G - - - - -  
* * * * *  
-----
```

Taylor universal 2000  
FCR3S1.2 var1  
FCR3S1.2 var2  
Chen 1998

```
-----  
G C A A T A A A A A A A A G C A A A A T G G A A A G A A A C A G A A A G A G A A A A A T T A G A A C A G A A A T T G A A A G A A A T  
C T A A T G A C A A A G A T G C A G T G C G G C A T G G T T T A A A G G T A G T T T T T A A G A A A A T A T A T G A T A A A T T G T C A C C  
-----
```

Taylor universal 2000  
FCR3S1.2 var1  
FCR3S1.2 var2  
Chen 1998

```
-----  
T T T C A A G A A A A T A C A T G A T A A T T T G A A A G A T A A G G A A G C A C A A A A A C G C T A C A A T G G T G A T G A A G A T C C A  
T A A A G T A C A A G A A C A T T A C A A A G A T G T T G A T G G A T C T G G A A A T T A C T A T A A A T T A G G G A A G A T T G G T G G  
-----
```

Taylor universal 2000  
FCR3S1.2 var1  
FCR3S1.2 var2  
Chen 1998

```
-----  
A A T T T T T A T A A A T T A C G A G A A G A T T G G T G G A C G G C G A A T C G A G A A A C A G T A T G G G G A G C C A T G A C A T G C A  
A C A G C G A A C A G A G A T C A A G T A T G G A A A G C C A T A A C A T A T A - - - - A A G C T C C A C A A G A C G C T A A T T A T T T  
-----
```

Taylor universal 2000  
FCR3S1.2 var1  
FCR3S1.2 var2  
Chen 1998

```
-----  
G C A A G G A G C T T T G A T A A T T C T T C A T A T T T T C G T G C A A C G T G C A A T G A T A C T G G A C A A G G T C C A T C A C A A A C  
T A G A A A T G T T T C A G G A - - - - - - - - - - - - - - - - - - - - - - - - - - - - - - - - - - - - - - - - - - - - - - - - - - - - - - - - - - - - -  
-----
```

Taylor universal 2000  
FCR3S1.2 var1  
FCR3S1.2 var2  
Chen 1998

```
-----  
C C A C A A C A A A T G C G G T G T G A T A A G G A C A A G G G C G C A A A T G C C G G C A A G C C A A A G G C T G G C G A C G G A G A T  
A G T G C A G G A - - - - - - - - - - - - - - - - - - - - - - - - - - - - - - - - - - - - - - - - - - - - - - - - - - - - - - - - - - - - -  
-----
```

Taylor universal 2000  
FCR3S1.2 var1  
FCR3S1.2 var2  
Chen 1998

```
-----*-----  
- - - - - T G G T T C G A S G A A T G G G C - - - - -  
G T A A C T A T T G T C C C A C A T A T T T T G A T T A C G T T C C T C A A T A T T T G A G A T G G T T C G A G G A A T G G G C  
G A C A A T A G C G T C C C A A C G A A T C T A G A T T A T G T C C C T C A A T T T T A C G T T G G T A C G A T G A A T G G G C  
- - - - - G A Y T A Y G T W C C W C A R T A Y Y T - - - - -  
* * * * *  
-----
```
